# Supplementary material for: Controlled Synthesis of Porous Co3O4 Nanostructures for Efficient Electrochemical Sensing of Glucose
Source: Hindawi journal article supplement (doi:10.1155/2019/8346251), 2019-09-16
Supplement: f1 [file 8346251.f1.pdf]

**Supporting Information**

**Controlled synthesis of porous Co<sub>3</sub>O<sub>4</sub> nanostructures for efficiently  
electrochemical sensing of glucose**

Jiankang Luo<sup>1</sup>, Jun Wu<sup>1</sup>, Zheng Liu<sup>2</sup>, Zenghe Li<sup>1\*</sup>, Li Deng<sup>1,3\*</sup>

<sup>1</sup>*College of Life Science and Technology, Beijing University of Chemical Technology,  
Beijing 100029, P. R. China*

<sup>2</sup>*Chinese Research Academy of Environmental Sciences, Beijing 100012, P. R. China*

<sup>3</sup>*Amoy-BUCT Industrial Bio-technovation Institute, Beijing University of Chemical  
Technology, Amoy, 361022, China*

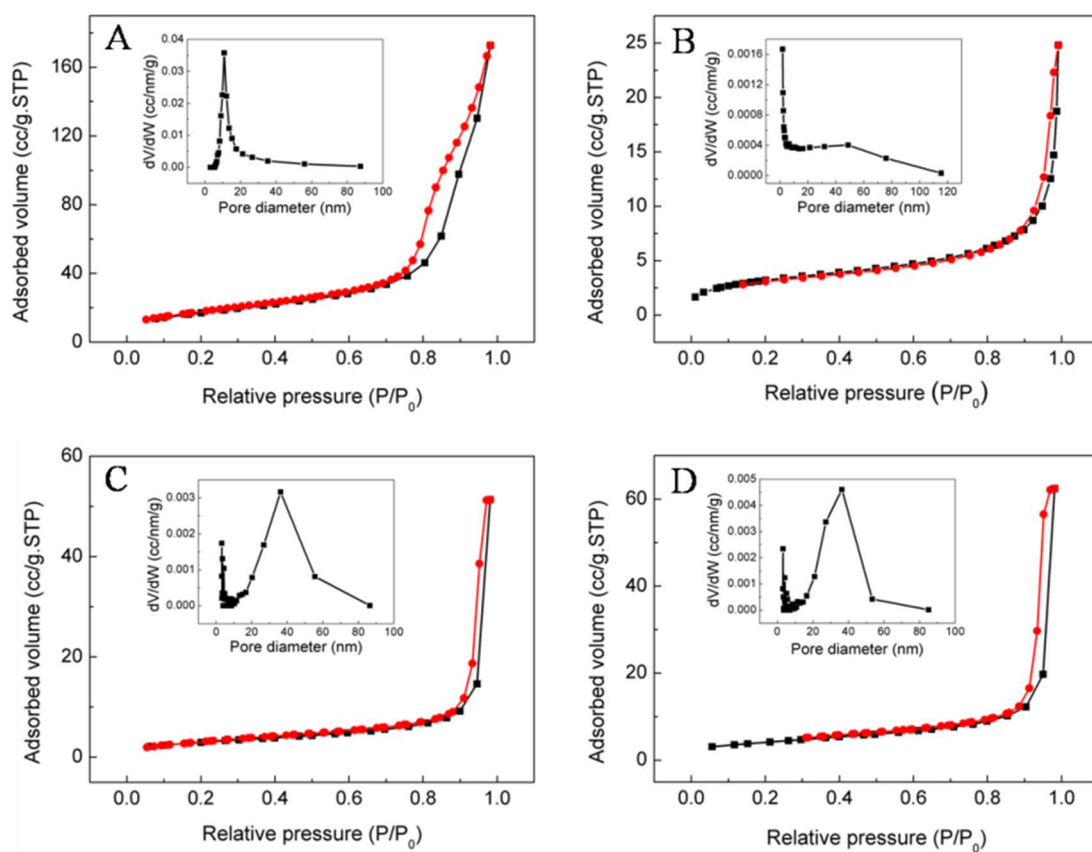

**Figure S1** Nitrogen adsorption/desorption isotherms and corresponding BJH pore size distribution (inset) of  $\text{Co}_3\text{O}_4$  (a) nanourchins, (b) nanowires, (c) nanoflowers, and (d) nanoplates

**Table S1.** The surface area, pore volume, and average pore size of Co<sub>3</sub>O<sub>4</sub> nanomaterials

| Co <sub>3</sub> O <sub>4</sub> | Surface area<br>(m <sup>2</sup> g <sup>-1</sup> ) | Pore volume<br>(cm <sup>3</sup> g <sup>-1</sup> ) | Average<br>pore size<br>( nm ) |
|--------------------------------|---------------------------------------------------|---------------------------------------------------|--------------------------------|
| nanourchins                    | 77.76                                             | 0.271                                             | 10.81                          |
| nanowires                      | 11.75                                             | 0.074                                             | 18.56                          |
| nanoflowers                    | 9.93                                              | 0.079                                             | 36.22                          |
| nanoplates                     | 13.06                                             | 0.074                                             | 18.56                          |

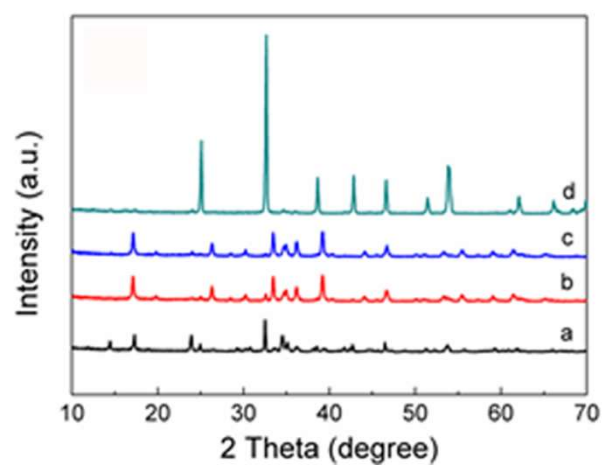

**Figure S2** The XRD patterns of obtained  $\text{Co}_3\text{O}_4$  nanoparticles before annealing treatment: (a) nanourchins, (b) nanowires, (c) nanoflowers, and (d) nanoplates.

**Table S2.** Performances of typical electrochemical sensing materials for glucose detection

| Electrode                                  | Sensitivity<br>( $\mu\text{A mM}^{-1} \text{cm}^{-2}$ ) | Linear range<br>( $\mu\text{M}$ ) | Detection limit<br>( $\mu\text{M}$ ) | Reference |
|--------------------------------------------|---------------------------------------------------------|-----------------------------------|--------------------------------------|-----------|
| PtPb/MCV                                   | 0.11                                                    | 1500-12000                        | 120                                  | 1         |
| CuO nanospheres                            | 400                                                     | 50- 2550                          | 1.0                                  | 2         |
| CuO nanorods                               | 371.43                                                  | 4-8000                            | 4.0                                  | 3         |
| Co <sub>3</sub> O <sub>4</sub> nanofibers  | 36.25                                                   | 20-2040                           | 0.97                                 | 4         |
| Au nanowire                                | 309.0                                                   | 1000-10000                        | 50                                   | 5         |
| PtRu/MWCNTs                                | 28.26                                                   | 1000-15000                        | 25                                   | 6         |
| Ni-BDD                                     | 1040                                                    | 10-10000                          | 2.7                                  | 7         |
| Ni foil                                    | 670                                                     | 20-10000                          | 1.8                                  | 7         |
| Co <sub>3</sub> O <sub>4</sub> nanourchin  | 565                                                     | 20-250                            | 1.5                                  | This work |
| Co <sub>3</sub> O <sub>4</sub> nanowires   | 99                                                      | 20-300                            | 1.0                                  |           |
| Co <sub>3</sub> O <sub>4</sub> nanoflowers | 217                                                     | 20-250                            | 0.8                                  |           |
| Co <sub>3</sub> O <sub>4</sub> nanoflates  | 104                                                     | 20-250                            | 0.9                                  |           |

- [1] X. Bo, J. Bai, L. Guo, Sensors and Actuators B 157 (2011) 662.  
[2] E. Reitz, W. Jia, M. Gentile, Y. Wang, Y. Lei, Electroanalysis 20 (2008) 2482.  
[3] X. Wang, C.G. Hu, H. Liu, G.J. Du, X.S. He, Y. Xi, Sensors and Actuators B: Chemical 144 (2010) 220.  
[4] Y. Ding, Y. Wang, L. Su, M. Bellagamba, H. Zhang, Y. Lei, Biosensors and Bioelectronics 26 (2010) 542.  
[5] S. Cherevko, C-H. Chung, Sensors and Actuators B 142 (2009) 216.  
[6] L.H. Li, W.D. Zhang, J.S. Ye, Electroanalysis 20 (2008) 2212.  
[7] K.E. Toghill, L. Xiao, M.A. Phillips, R.G. Compton, Sensors and Actuators B 147 (2010) 642.

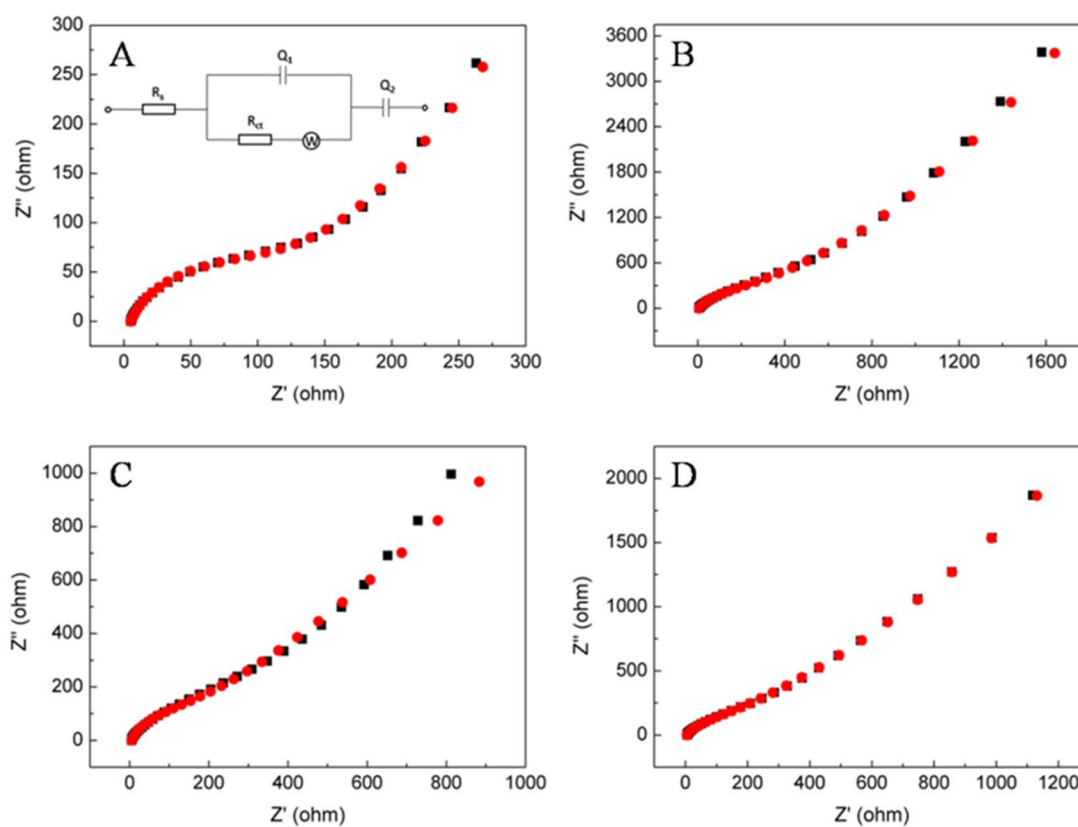

**Figure S3** Impedance nyquist plots of (a) nanourchins, (b) nanowires, (c) nanoflowers and (d) nanoplates  $\text{Co}_3\text{O}_4$  at open circuit potential in 0.1 M NaOH solution.

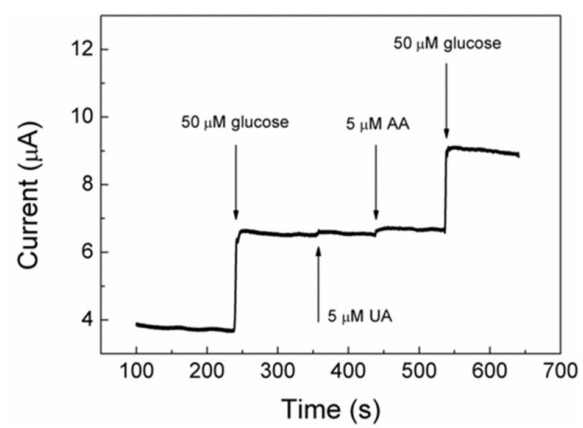

Figure S4 The amperometric response to the addition of glucose with interfering species.
